# Supplementary material for: Personal Identification by Fingerprints based on Gabor Filters.
Source: Royal Society of Chemistry journal article supplement (doi:10.1039/c5dt00533g), 2009-01-01
Supplement: c5dt00533g1.pdf [file c5dt00533g1.pdf]

Supporting Information for the manuscript

**A one-dimensional coordination polymer based on Cu<sub>3</sub>-oximate  
metallacrowns bridged by benzene-1,4-dicarboxylate ligands:  
structure and magnetic properties**

Lilia Croitor,<sup>a\*</sup> Eduard B. Coropceanu,<sup>b</sup> Oleg Petuhov,<sup>b</sup> Karl W. Krämer,<sup>c</sup> Svetlana G. Baca,<sup>a</sup> Shi-Xia Liu,<sup>c</sup> Silvio Decurtins<sup>c</sup> and Marina S. Fonari<sup>a</sup>

<sup>a</sup> Institute of Applied Physics, Academy of Sciences of R. Moldova, Academy str., 5 MD2028, Chisinau, Moldova; Tel.: + 373 22 738154; fax: + 373 22 725887, [croitor.lilia@gmail.com](mailto:croitor.lilia@gmail.com)

<sup>b</sup> Institute of Chemistry, Academy of Sciences of R. Moldova, Academy str., 3 MD2028, Chisinau, Moldova;

<sup>c</sup> Department of Chemistry and Biochemistry, University of Bern, Freiestrasse 3, 3012 Bern, Switzerland.

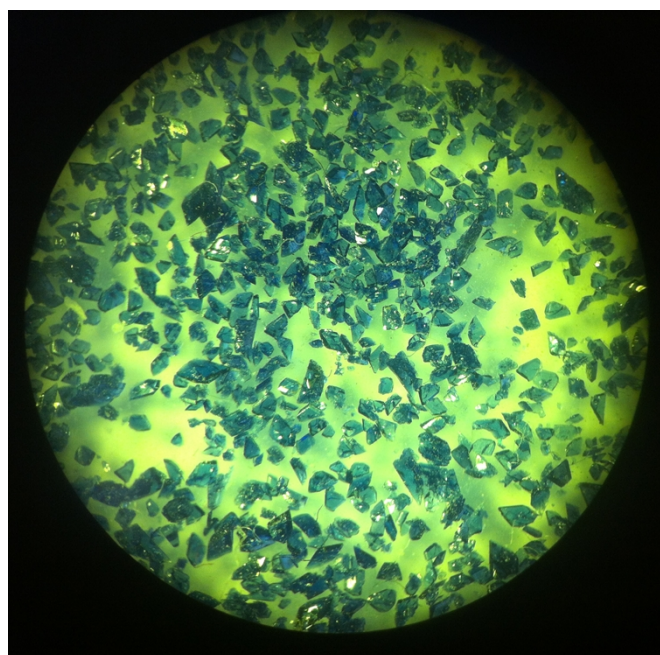

**Fig. 1S.** View of as-grown crystals of **1**.

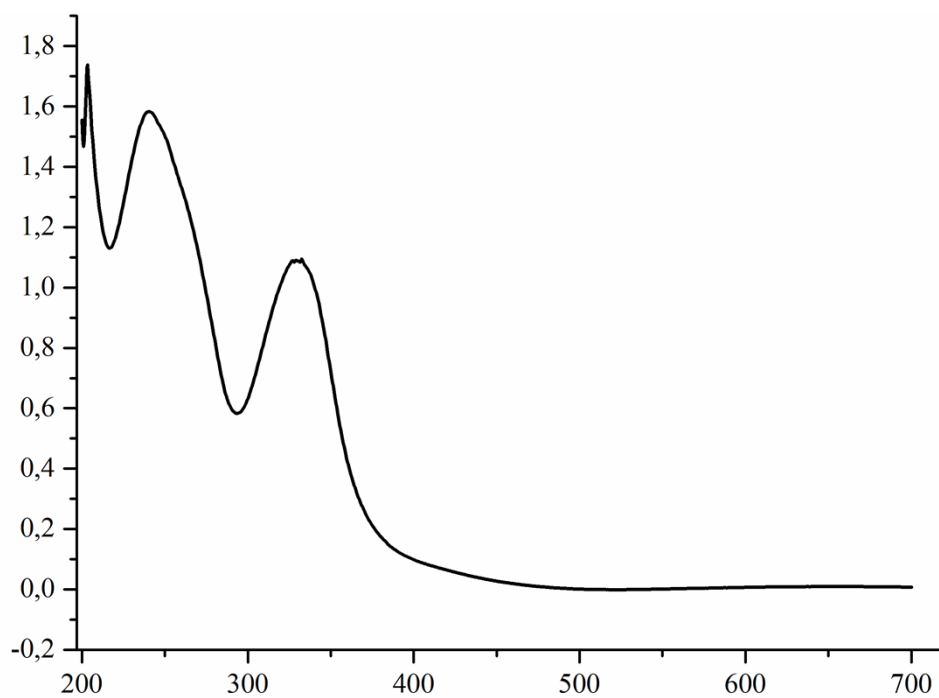

**Fig. 2S.** UV-vis spectrum for **1** measured in methanol solution.

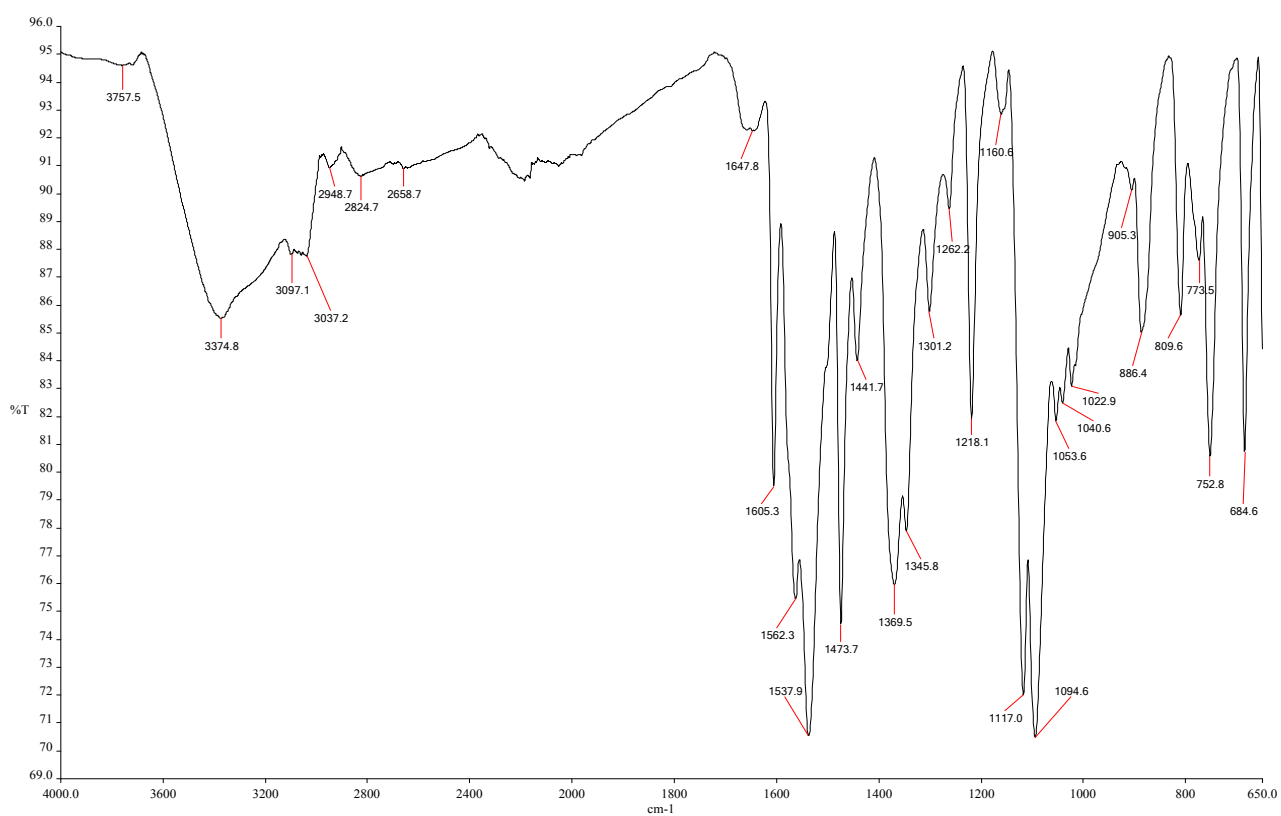

**Fig. 3S** IR spectrum for **1**

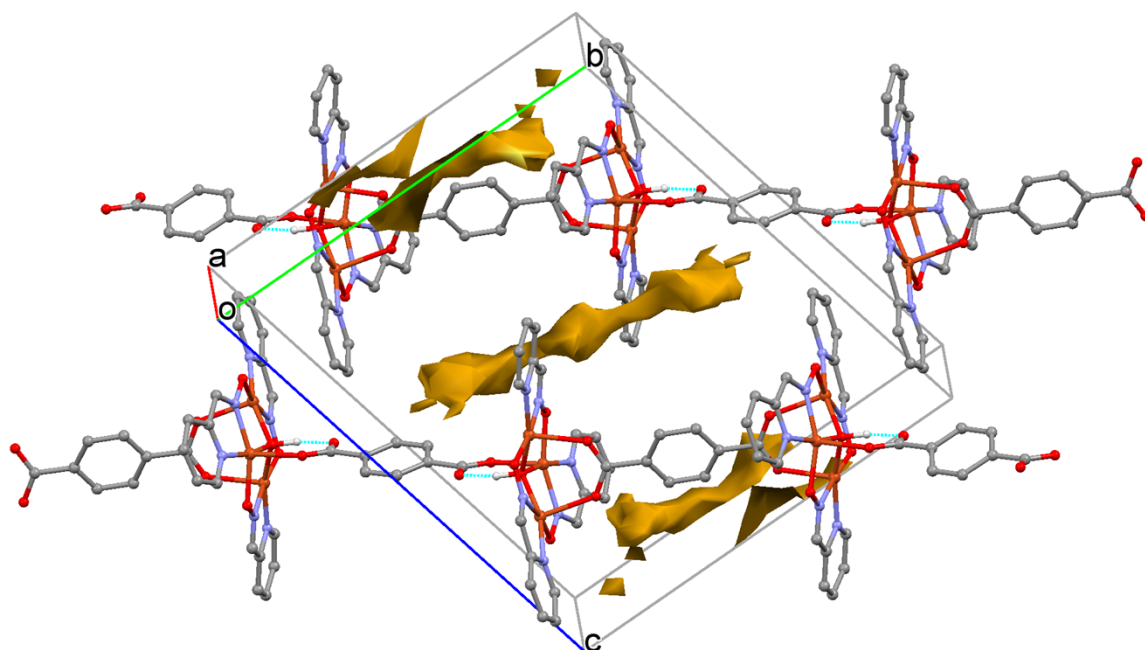

**Fig. 4S** Crystal packing in **1** with simulated solvent-accessible voids shown in yellow. Solvent water molecules are omitted.

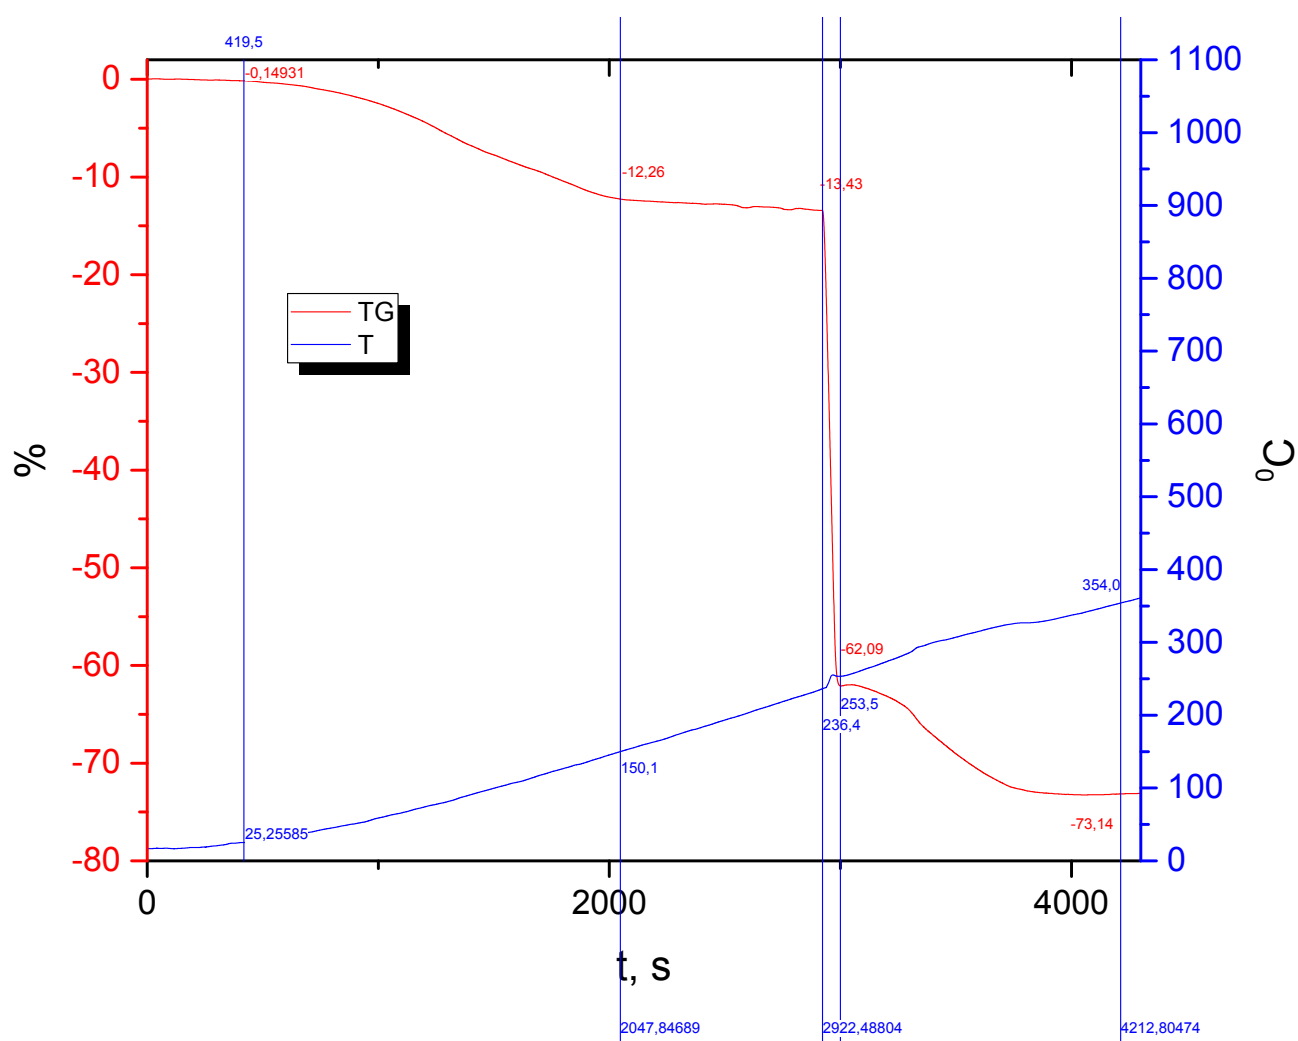

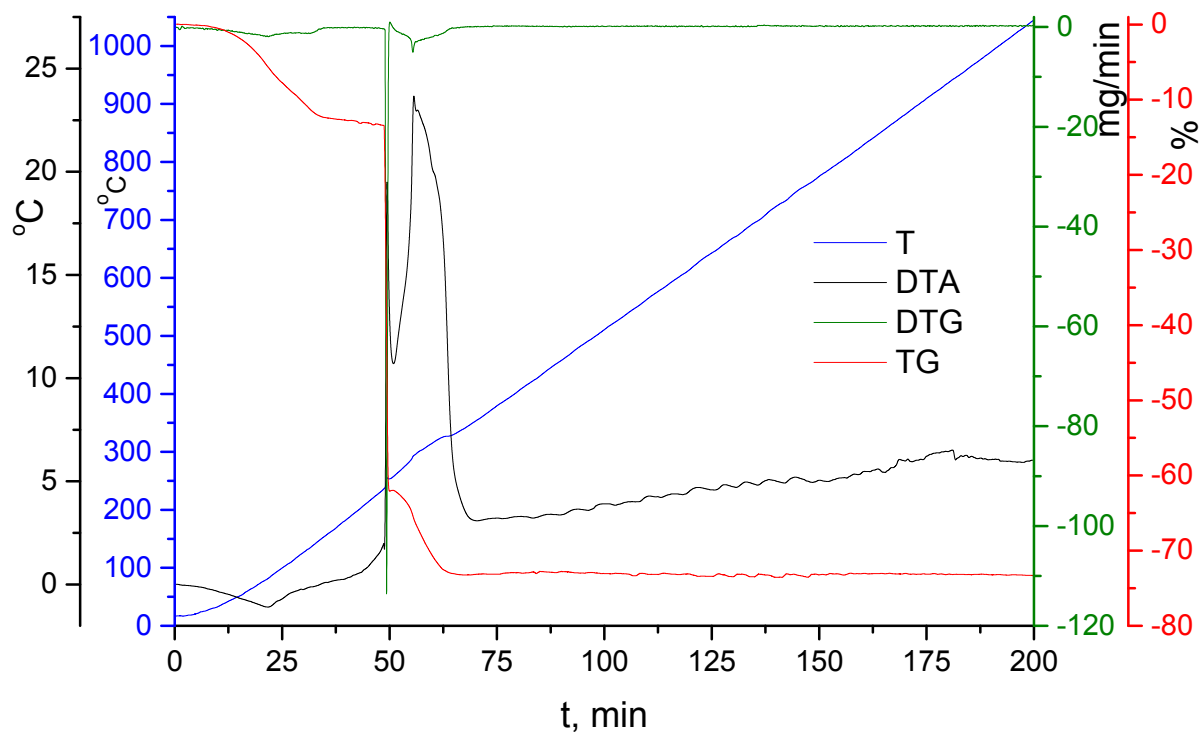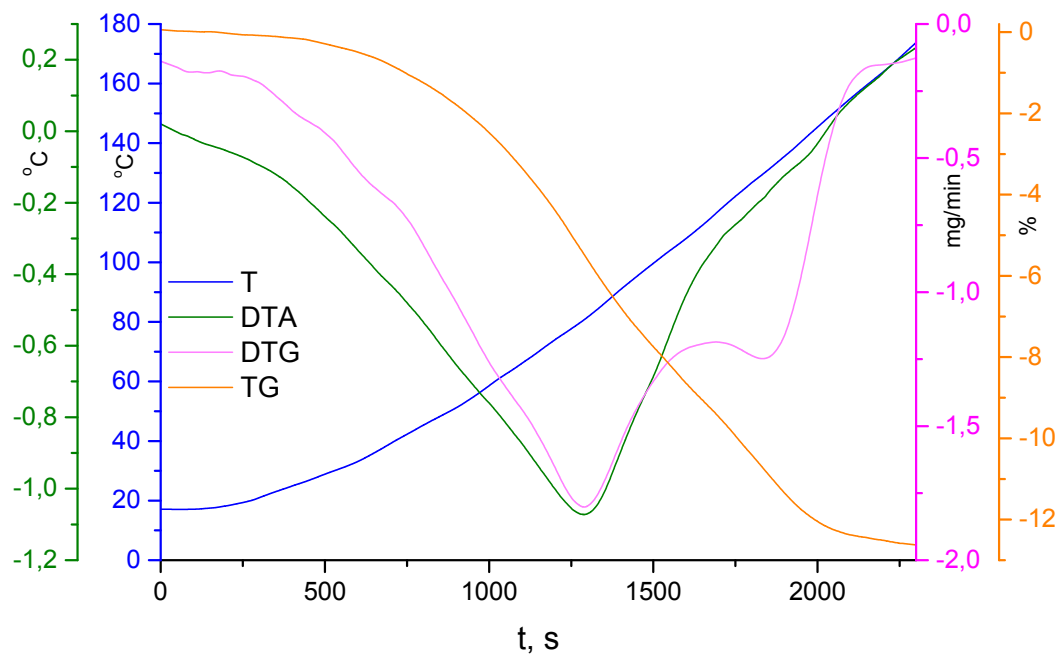

**Fig. 5S.** TG and DTA curves for **1** in air atmosphere. Heating speed 5gr/min, sample mass  $m=38.0$  mg.

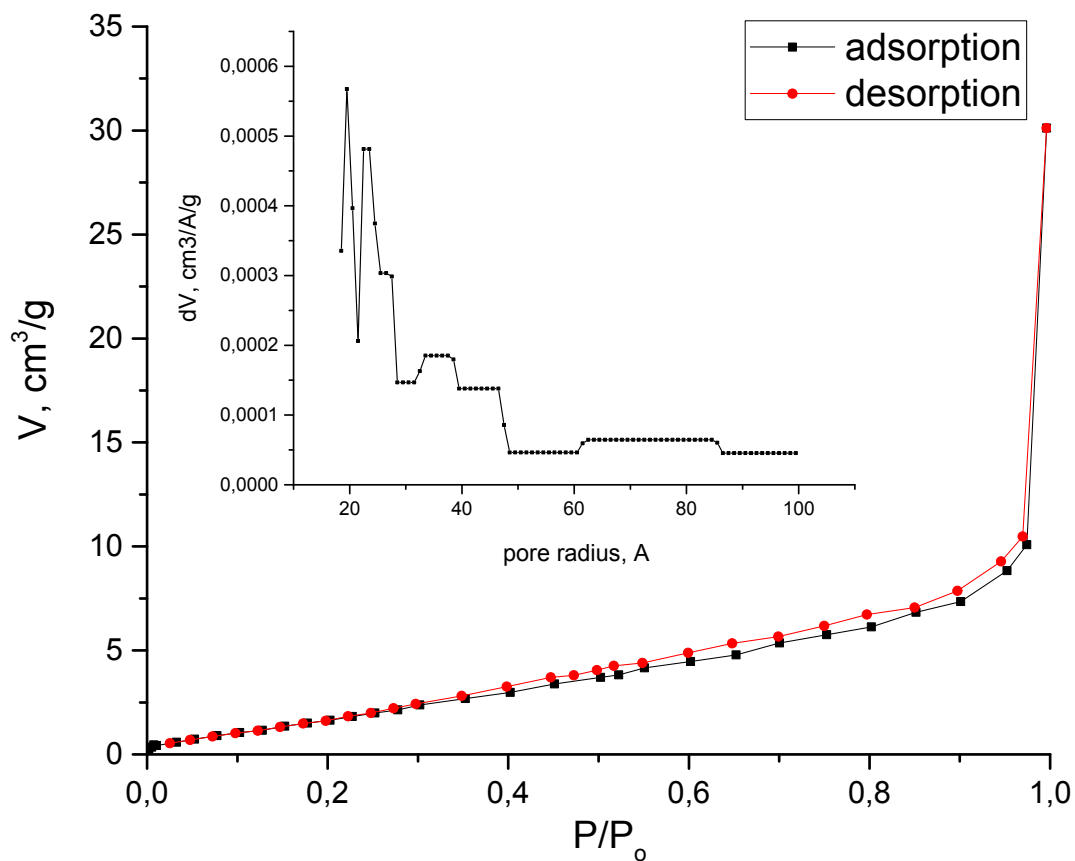

**Fig. 6S.** Adsorption-desorption  $N_2$  isotherm for the dehydrated **1** at 77 K. Insert: pores distribution in the dehydrated sample.

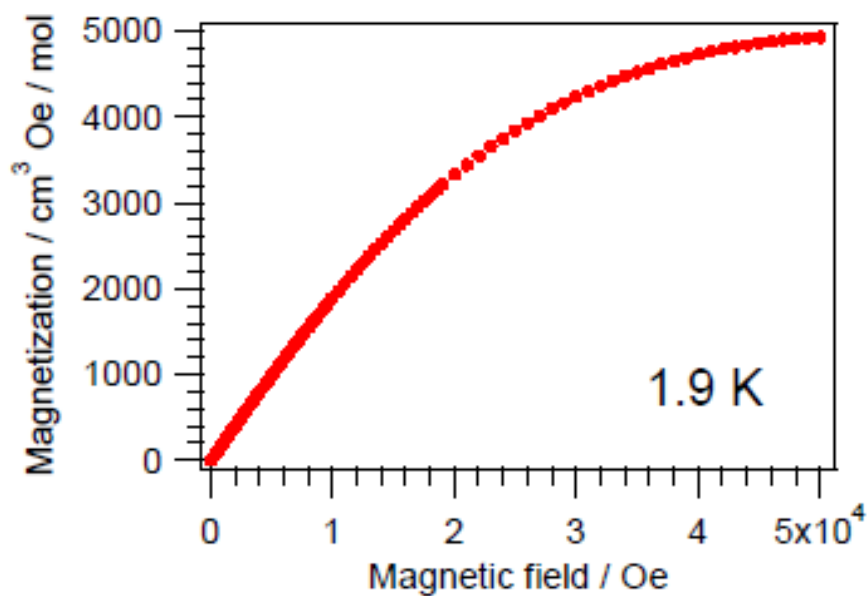

**Fig. 7S.** Magnetization vs field data for **1**.
